# Supplementary material
Source: ML conference proceedings conference paper supplement (https://openreview.net/forum?id=Y8Jfbqx0bA)
Supplement: supplementary_material [file attachment]

## A Additional Background

### A.1 Total Variation Distance Properties

Recall the definition of total variation distance:

**Definition 2.1.** *The total variation distance between random variables (or distributions)  $P_1$  and  $P_2$  is*

$$\text{TV}(P_1, P_2) = \sup_A |\Pr(P_1 \in A) - \Pr(P_2 \in A)|, \quad (2)$$

where  $A$  is any measurable set.

**Lemma A.1** (Kelbert (2023)). *Properties of total variation distance:*

1. For probability densities  $p_1$  and  $p_2$ ,

$$\text{TV}(p_1, p_2) = \frac{1}{2} \int |p_1(x) - p_2(x)| dx. \quad (18)$$

2. Total variation distance is a metric.

3. Pinsker's inequality: for distributions  $P_1$  and  $P_2$ ,

$$\text{TV}(P_1, P_2) \leq \sqrt{\frac{1}{2} \text{KL}(P_1 || P_2)} \quad (19)$$

4. Invariance to bijections: if  $f$  is a bijection and  $P_1$  and  $P_2$  are random variables,

$$\text{TV}(f(P_1), f(P_2)) = \text{TV}(P_1, P_2) \quad (20)$$

We also occasionally write  $\text{TV}(p_1, p_2)$  for probability densities  $p_1$  and  $p_2$  as

$$\text{TV}(p_1, p_2) = \sup_h \left| \int h(x)p_1(x) dx - \int h(x)p_2(x) dx \right| \quad (21)$$

where  $h$  is an indicator function of some measurable set  $A$ .

### A.2 Bernstein–von Mises Theorem Regularity Conditions

The version of the Bernstein–von Mises theorem we use is from van der Vaart (1998). To state the regularity conditions, we need two definitions:

**Definition A.2.** *A parametric probability density  $p_Q$  is differentiable in quadratic mean at  $Q_0$  if there exists a measurable vector-valued function  $\dot{\ell}_{Q_0}$  such that, as  $Q \rightarrow Q_0$ ,*

$$\int \left( \sqrt{p_Q(x)} - \sqrt{p_{Q_0}(x)} - \frac{1}{2}(Q - Q_0)^T \dot{\ell}_{Q_0}(x) \sqrt{p_{Q_0}(x)} \right)^2 dx = o(\|Q - Q_0\|_2^2). \quad (22)$$

**Definition A.3.** *A randomised test is a function  $\phi: \mathcal{X} \rightarrow [0, 1]$ .*

The interpretation of  $\phi(X)$  is the probability of rejecting some null hypothesis after observing data  $X$ .

Now we can state the regularity conditions of Theorem 2.2:

**Condition A.4** (van der Vaart (1998)). *For true parameter value  $Q_0$  and observed data  $X_n$ :*

1. The datapoints of  $X_n$  are i.i.d.

2. The likelihood  $p(x|Q)$  for a single datapoint  $x$  is differentiable in quadratic mean at  $Q_0$ .

3. The Fisher information matrix of  $p(x|Q)$  is nonsingular at  $Q_0$ .

4. For every  $\beta > 0$ , there exists a sequence of randomised tests  $\phi_n$  such that

$$p(X_n|Q_0)\phi_n(X_n) \rightarrow 0, \quad \sup_{\|Q - Q_0\|_2 \geq \beta} p(X_n|Q)(1 - \phi_n(X_n)) \rightarrow 0. \quad (23)$$

5. The prior  $p(Q)$  is absolutely continuous (as a measure) in a neighbourhood of  $Q_0$  with a continuous positive density at  $Q_0$ .

### A.3 Differential Privacy and Noise-Aware Synthetic Data

*Differential privacy* (DP) (Dwork et al. 2006b) quantifies the privacy loss from releasing the results of analysing data. The quantification is done by looking at the output distributions of the analysis algorithm for two datasets that differ in a single data subject (Dwork and Roth 2014):

**Definition A.5.** An algorithm  $\mathcal{M}$  is  $(\epsilon, \delta)$ -DP if

$$\Pr(\mathcal{M}(X) \in S) \leq e^\epsilon \Pr(\mathcal{M}(X') \in S) + \delta \quad (24)$$

for all measurable sets  $S$  and all datasets  $X, X'$  that differ in one data subject.

The choice of  $\epsilon$  and  $\delta$  is a matter of policy (Dwork 2008). One should set  $\delta \ll \frac{1}{n}$  for  $n$  datapoints, as  $\delta \approx \frac{1}{n}$  permits mechanisms that clearly violate privacy (Dwork and Roth 2014).

A common primitive for making an algorithm DP is the *Gaussian mechanism* (Dwork et al. 2006a), which simply adds Gaussian noise to the output of a function:

**Definition A.6.** The *Gaussian mechanism* with noise variance  $\sigma_{DP}^2$  and function  $f$  outputs  $f(X) + \mathcal{N}(0, \sigma_{DP}^2 I)$  for input  $X$ .

For a given  $(\epsilon, \delta)$ -bound and function  $f$ , the required value for  $\sigma_{DP}^2$  can be computed tightly using the analytical Gaussian mechanism (Balle and Wang 2018).

**Noise-Aware Private Synthetic Data** To solve the uncertainty estimation problem for frequentist analyses from DP synthetic data, Räisä et al. (2023) developed a noise-aware algorithm for generating synthetic data called NAPSU-MQ. NAPSU-MQ takes discrete data, summarises it with marginal queries, releases the query values under DP with the Gaussian mechanism, and finally generates multiple synthetic datasets. The downstream analysis is done on each synthetic dataset, and the results are combined using Rubin’s rules for synthetic data (Raghunathan et al. 2003; Rubin 1993), which use the multiple analysis results to account for the extra uncertainty coming from the synthetic data generation.

The synthetic data is generated by sampling the posterior predictive distribution

$$p(X^* | \tilde{s}) = \int p(X^* | \theta) p(\theta | \tilde{s}) d\theta. \quad (25)$$

The conditioning on  $\tilde{s}$  and including the Gaussian mechanism in the model is what makes NAPSU-MQ noise-aware, and allows Rubin’s rules to accurately account for the synthetic data generation and DP noise in the downstream analysis.

### A.4 Bayesian Inference with Gaussian Models

In this section, we collect well-known results on Bayesian inference of a Gaussian mean. See Gelman et al. (2014) for proofs.

**Scaled inverse-chi-square distribution** This parameterisation of the inverse gamma distribution is convenient in this setting.

$$\text{Inv-}\chi^2(\nu, s^2) = \text{Inv-Gamma}\left(\alpha = \frac{\nu}{2}, \beta = \frac{\nu}{2}s^2\right). \quad (26)$$

If  $\theta \sim \text{Inv-}\chi^2(\nu, s^2)$ ,  $\theta > 0$ ,

$$p(\theta) = \frac{\left(\frac{\nu}{2}\right)^{\frac{\nu}{2}}}{\Gamma\left(\frac{\nu}{2}\right)} s^\nu \theta^{-(\frac{\nu}{2}+1)} e^{-\frac{\nu s^2}{2\theta}} \quad (27)$$

$$\mathbb{E}(\theta) = \frac{\nu}{\nu - 2} s^2, \quad \nu > 2 \quad (28)$$

$$\text{Var}(\theta) = \frac{2\nu^2}{(\nu - 2)^2(\nu - 4)} s^4, \quad \nu > 4. \quad (29)$$

452 **Gaussian Model with Known Variance** When the variance of the data is known to be  $\sigma_k^2$ , and only  
 453 the mean is unknown, the conjugate prior is another Gaussian, and we get the following inference  
 454 problem:

$$\mu \sim \mathcal{N}(\mu_0, \sigma_0^2) \quad (30)$$

$$x_i | \mu \sim \mathcal{N}(\mu, \sigma_k^2). \quad (31)$$

455 The posterior with  $n$  datapoints with sample mean  $\bar{X}$  is:

$$\mu | X \sim \mathcal{N}(\mu_n, \sigma_n^2) \quad (32)$$

$$\mu_n = \frac{\frac{1}{\sigma_0^2} \mu_0 + \frac{n}{\sigma_k^2} \bar{X}}{\frac{1}{\sigma_0^2} + \frac{n}{\sigma_k^2}} \quad (33)$$

$$\frac{1}{\sigma_n^2} = \frac{1}{\sigma_0^2} + \frac{n}{\sigma_k^2}. \quad (34)$$

456 **Gaussian Model with Unknown Variance** When the variance of the data is also unknown, the  
 457 conjugate prior is a inverse-chi-squared for the variance, and Gaussian for the mean, which gives the  
 458 following inference problem:

$$\sigma^2 \sim \text{Inv-}\chi^2(\nu_0, \sigma_0^2) \quad (35)$$

$$\mu | \sigma^2 \sim \mathcal{N}\left(\mu_0, \frac{\sigma^2}{\kappa_0}\right) \quad (36)$$

$$x_i | \mu, \sigma^2 \sim \mathcal{N}(\mu, \sigma^2). \quad (37)$$

459 The joint posterior of  $\mu$  and  $\sigma^2$  for  $n$  datapoints is:

$$\sigma^2 | X \sim \text{Inv-}\chi^2(\nu_n, \sigma_n^2) \quad (38)$$

$$\mu | \sigma^2, X \sim \mathcal{N}\left(\mu_n, \frac{\sigma^2}{\kappa_n}\right) \quad (39)$$

$$(40)$$

460 with

$$\bar{X} = \frac{1}{n} \sum_{i=1}^n x_i \quad (41)$$

$$s^2 = \frac{1}{n-1} \sum_{i=1}^n (x_i - \bar{X})^2 \quad (42)$$

$$\mu_n = \frac{\kappa_0}{\kappa_0 + n} \mu_0 + \frac{n}{\kappa_0 + n} \bar{X} \quad (43)$$

$$\kappa_n = \kappa_0 + n \quad (44)$$

$$\nu_n = \nu_0 + n \quad (45)$$

$$\nu_n \sigma_n^2 = \nu_0 \sigma_0^2 + (n-1)s^2 + \frac{\kappa_0 n}{\kappa_0 + n} (\bar{X} - \mu_0)^2. \quad (46)$$

461 The marginal posterior of  $\mu$  is

$$\mu | X \sim t_{\nu_n} \left( \mu_n, \frac{\sigma_n^2}{\kappa_n} \right). \quad (47)$$

## 462 B Missing Proofs

### 463 B.1 Consistency Proof

464 For ease of reference, we repeat Theorem [2.2](#) and Condition [3.2](#):

**Theorem 2.2** (Bernstein–von Mises (van der Vaart 1998)). Let  $n$  denote the size of the dataset  $X_n$ . Under regularity conditions stated in Condition A.4 in Supplemental Section A.2 for true parameter value  $Q_0$ , the posterior  $\bar{Q}(X_n) \sim p(Q|X_n)$  satisfies

$$\text{TV}(\sqrt{n}(\bar{Q}(X_n) - Q_0), \mathcal{N}(\mu(X_n), \Sigma)) \xrightarrow{P} 0 \quad (3)$$

as  $n \rightarrow \infty$  for some  $\mu(X_n)$  and  $\Sigma$ , that do not depend on the prior, where the convergence in probability is over sampling  $X_n \sim p(X_n|Q_0)$ .

Recall that  $\bar{Q}_n^+ \sim p(Q|Z, X_n^*)$ , and  $\bar{Q}_n \sim p(Q|X_n^*)$ .

**Condition 3.2.** For all  $Q$  there exist distributions  $D_n$  such that

$$\text{TV}(\bar{Q}_n^+, D_n) \xrightarrow{P} 0 \quad \text{and} \quad \text{TV}(\bar{Q}_n, D_n) \xrightarrow{P} 0 \quad (10)$$

as  $n \rightarrow \infty$ , where the convergence in probability is over sampling  $X_n^* \sim p(X_n^*|Z, Q)$ .

**Lemma 3.3.** If the assumptions of Theorem 2.2 (Condition A.4) and the following assumptions:

(1)  $Z$  and  $X^*$  are conditionally independent given  $Q$ ; and

(2)  $p(Z|Q) > 0$  for all  $Q$ ,

hold for the downstream analysis for all  $Q_0$ , then Condition 3.2 holds.

*Proof.* Under Assumption (1)

$$p(Q|Z, X_n^*) \propto p(X_n^*|Q)p(Z|Q)p(Q) \quad (48)$$

so we can view both  $p(Q|Z, X_n^*)$  and  $p(Q|X_n^*)$  as the posteriors for the same Bayesian inference problem with observed data  $X_n^*$ , and priors  $p(Q|Z) \propto p(Z|Q)p(Q)$  and  $p(Q)$ , respectively. Due to Condition A.4 (5) and Assumption (2),  $p(Q|Z)$  has an everywhere positive density. Recall that  $\bar{Q}_n^+ \sim p(Q|Z, X_n^*)$  and  $\bar{Q}_n \sim p(Q|X_n^*)$ . Now, Theorem 2.2 gives

$$\text{TV}(\sqrt{n}(\bar{Q}_n^+ - Q_0), \mathcal{N}(\mu_n, \Sigma)) \xrightarrow{P} 0 \quad (49)$$

and

$$\text{TV}(\sqrt{n}(\bar{Q}_n - Q_0), \mathcal{N}(\mu_n, \Sigma)) \xrightarrow{P} 0 \quad (50)$$

as  $n \rightarrow \infty$ , where  $\mu_n, \Sigma$  are equal in the two cases because they do not depend on the prior. The probability is over  $X_n^* \sim p(X_n^*|Q_0)$ . Because of Assumption (1),  $p(X_n^*|Q_0) = p(X_n^*|Z, Q_0)$ , so the convergence also holds with probability over  $X_n^* \sim p(X_n^*|Z, Q_0)$ . These hold for any  $Q_0$ . Because the function  $f_n(q) = \sqrt{n}(q - Q_0)$  is a bijection and total variation distance is invariant to bijections, Condition 3.2 holds with  $D_n$  being the pushforward distribution  $D_n = f_n^{-1} \circ \mathcal{N}(\mu_n, \Sigma)$ , with the  $Q$  of Condition 3.2 being  $Q_0$ . Note that  $D_n$  is allowed to depend on  $Q$  in Condition 3.2 due to the order of quantifiers.  $\square$

**Lemma B.1.** Under Condition 3.2

$$\text{TV}(\bar{Q}_n^+, \bar{Q}_n) \xrightarrow{P} 0 \quad (51)$$

as  $n \rightarrow \infty$ , with the probability over  $X_n^* \sim p(X_n^*|Z)$ .

*Proof.* Total variation distance is a metric, so

$$\text{TV}(\bar{Q}_n^+, \bar{Q}_n) \leq \text{TV}(\bar{Q}_n^+, D_n) + \text{TV}(\bar{Q}_n, D_n) \quad (52)$$

so by Condition 3.2

$$\text{TV}(\bar{Q}_n^+, \bar{Q}_n) \xrightarrow{P} 0 \quad (53)$$

as  $n \rightarrow \infty$ , with the probability over  $X_n^* \sim p(X_n^*|Z, Q)$ .

It remains to show (53) with the probability over  $X_n^* \sim p(X_n^*|Z)$  instead of  $X_n^* \sim p(X_n^*|Z, Q)$ .

With  $X_n^* \sim p(X_n^*|Z)$ , for any  $\epsilon > 0$ ,

$$\Pr_{X_n^*|Z}(\text{TV}(\bar{Q}_n^+, \bar{Q}_n) > \epsilon) = \int \Pr_{X_n^*|Z, Q}(\text{TV}(\bar{Q}_n^+, \bar{Q}_n) > \epsilon) p(Q|Z) dQ \quad (54)$$

497 (53) holds for any  $Q$ , so

$$\lim_{n \rightarrow \infty} \Pr_{X_n^*|Z, Q}(\text{TV}(\bar{Q}_n^+, \bar{Q}_n) > \epsilon) = 0 \quad (55)$$

498 The dominated convergence theorem then implies that

$$\lim_{n \rightarrow \infty} \Pr_{X_n^*|Z}(\text{TV}(\bar{Q}_n^+, \bar{Q}_n) > \epsilon) = 0 \quad (56)$$

499 so

$$\text{TV}(\bar{Q}_n^+, \bar{Q}_n) \xrightarrow{P} 0 \quad (57)$$

500 as  $n \rightarrow \infty$ , with the probability over  $X_n^* \sim p(X_n^*|Z)$ .  $\square$

501 **Lemma B.2.** Let  $y_n \sim U_n$  be an arbitrary sequence of continuous random variables and let  $S(y_n)$ ,  
502  $T(y_n)$  be continuous random variables that depend on  $y_n$ . Let the density functions of  $S(y_n)$ ,  $T(y_n)$   
503 and  $U_n$  be  $f_{S(y_n)}$ ,  $f_{T(y_n)}$  and  $f_{U_n}$ , respectively. If

$$\text{TV}(S(y_n), T(y_n)) \xrightarrow{P} 0 \quad (58)$$

504 as  $n \rightarrow \infty$ , where the probability is over  $y_n \sim U_n$ , then

$$\text{TV}\left(\int f_{S(y_n)}(x) f_{U_n}(y_n) dy_n, \int f_{T(y_n)}(x) f_{U_n}(y_n) dy_n\right) \rightarrow 0 \quad (59)$$

505 as  $n \rightarrow \infty$ .

506 *Proof.* Let  $h$  be an indicator function of  $x$  over any measurable set and let  $\epsilon > 0$ . Then

$$\left| \int h(x) \int f_{S(y_n)}(x) f_{U_n}(y_n) dy_n dx - \int h(x) \int f_{T(y_n)}(x) f_{U_n}(y_n) dy_n dx \right| \quad (60)$$

$$= \left| \int h(x) \int f_{U_n}(y_n) (f_{S(y_n)}(x) - f_{T(y_n)}(x)) dy_n dx \right| \quad (61)$$

$$= \left| \int f_{U_n}(y_n) \int h(x) (f_{S(y_n)}(x) - f_{T(y_n)}(x)) dx dy_n \right| \quad (62)$$

$$\leq \int f_{U_n}(y_n) \left| \int h(x) (f_{S(y_n)}(x) - f_{T(y_n)}(x)) dx \right| dy_n \quad (63)$$

$$= \int f_{U_n}(y_n) \left| \int h(x) f_{S(y_n)}(x) dx - \int h(x) f_{T(y_n)}(x) dx \right| dy_n \quad (64)$$

507 Because  $\text{TV}(S(y_n), T(y_n)) \xrightarrow{P} 0$ , for large enough  $n$ , there is a set  $Y_n$  with  $\text{TV}(S(y_n), T(y_n)) < \frac{\epsilon}{2}$   
508 for all  $y_n \in Y_n$ , and  $\Pr(y_n \in Y_n^C) < \frac{\epsilon}{2}$ . As

$$\text{TV}(S(y_n), T(y_n)) = \sup_h \left| \int h(x) f_{S(y_n)}(x) dx - \int h(x) f_{T(y_n)}(x) dx \right| \leq 1 \quad (65)$$

509 now

$$\int f_{U_n}(y_n) \left| \int h(x) f_{S(y_n)}(x) dx - \int h(x) f_{T(y_n)}(x) dx \right| dy_n \quad (66)$$

$$= \int_{Y_n} f_{U_n}(y_n) \left| \int h(x) f_{S(y_n)}(x) dx - \int h(x) f_{T(y_n)}(x) dx \right| dy_n \quad (67)$$

$$+ \int_{Y_n^C} f_{U_n}(y_n) \left| \int h(x) f_{S(y_n)}(x) dx - \int h(x) f_{T(y_n)}(x) dx \right| dy_n$$

$$< \int_{Y_n} f_{U_n}(y_n) \frac{\epsilon}{2} dy_n + \int_{Y_n^C} f_{U_n}(y_n) dy_n \quad (68)$$

$$< \frac{\epsilon}{2} + \frac{\epsilon}{2} \quad (69)$$

$$= \epsilon \quad (70)$$

510 for large enough  $n$ . Now

$$\text{TV} \left( \int f_{S(y_n)}(x) f_{U_n}(y_n) dy, \int f_{T(y_n)}(x) f_{U_n}(y_n) dy_n \right) \quad (71)$$

$$= \sup_h \left| \int h(x) \int f_{S(y_n)}(x) f_{U_n}(y_n) dy_n dx - \int h(x) \int f_{T(y_n)}(x) f_{U_n}(y_n) dy_n dx \right| \quad (72)$$

$$< \epsilon \quad (73)$$

511 for any  $\epsilon > 0$  with large enough  $n$ .  $\square$

512 **Theorem 3.4.** Under congeniality and Condition [3.2](#)  $\text{TV}(p(Q|Z), \bar{p}_n(Q)) \rightarrow 0$  as  $n \rightarrow \infty$ .

513 *Proof.* The claim follows from Lemma [B.2](#) with  $y_n = X_n^*$ ,  $U_n = p(X_n^*|Z)$ ,  $S(y_n) \sim p(Q|X_n^*)$  and  
514  $T(y_n) \sim p(Q|Z, X_n^*)$ . These meet the condition for Lemma [B.2](#) due to Lemma [B.1](#).  $\square$

## 515 B.2 Convergence Rate

516 **Definition 3.5.** A sequence of random variables  $X_n$  is uniformly integrable if

$$\lim_{M \rightarrow \infty} \sup_n \mathbb{E}(|X_n| \mathbb{I}_{|X_n| > M}) = 0 \quad (12)$$

517 **Lemma B.3.** If  $|X_n| \leq Y_n$  almost surely and  $Y_n$  is uniformly integrable,  $X_n$  is uniformly integrable.

*Proof.*

$$0 \leq \lim_{M \rightarrow \infty} \sup_n \mathbb{E}(|X_n| \mathbb{I}_{|X_n| > M}) \leq \lim_{M \rightarrow \infty} \sup_n \mathbb{E}(Y_n \mathbb{I}_{Y_n > M}) = 0 \quad (74)$$

518  $\square$

519 **Lemma B.4** (Billingsley ([1995](#)), Section 16). If  $X_n$  and  $Y_n$  are uniformly integrable,  $X_n + Y_n$  is  
520 uniformly integrable.

521 **Condition 3.6.** There exist distributions  $D_n$  such that for a sequence  $R_1, R_2, \dots > 0$ ,  $R_n \rightarrow 0$  as  
522  $n \rightarrow \infty$ ,

$$\frac{1}{R_n} \text{TV}(\bar{Q}_n^+, D_n) \quad \text{and} \quad \frac{1}{R_n} \text{TV}(\bar{Q}_n, D_n) \quad (13)$$

523 are uniformly integrable when  $X_n^* \sim p(X_n^*|Z)$ .

524 **Theorem 3.7.** Under congeniality and Condition [3.6](#)  $\text{TV}(p(Q|Z), \bar{p}_n(Q)) = O(R_n)$ .

525 *Proof.* Total variation distance is a metric, so

$$\frac{1}{R_n} \text{TV}(\bar{Q}_n^+, \bar{Q}_n) \leq \frac{1}{R_n} \text{TV}(\bar{Q}_n^+, D_n) + \frac{1}{R_n} \text{TV}(\bar{Q}_n, D_n). \quad (75)$$

526 Now Condition [3.6](#) and Lemmas [B.3](#) and [B.4](#) imply that

$$\frac{1}{R_n} \text{TV}(\bar{Q}_n^+, \bar{Q}_n) \quad (76)$$

527 is uniformly integrable with  $X_n^* \sim p(X_n^*|Z)$ .

528 Recall that

$$\frac{1}{R_n} \text{TV}(\bar{Q}_n^+, \bar{Q}_n) = \frac{1}{R_n} \sup_h \left| \int h(Q) p(Q|Z, X_n^*) dQ - \int h(Q) p(Q|X_n^*) dQ \right| \quad (77)$$

529 and

$$\begin{aligned} & \frac{1}{R_n} \text{TV}(p(Q|Z), \bar{p}_n(Q)) \\ &= \frac{1}{R_n} \sup_h \left| \int h(Q) \int p(Q|Z, X_n^*) p(X_n^*|Z) dX_n^* dQ - \int h(Q) \int p(Q|X_n^*) p(X_n^*|Z) dX_n^* dQ \right| \end{aligned} \quad (78)$$

530 where  $h$  is an indicator function.

531 For any indicator function  $h$ , using the start of the proof of Lemma [B.2](#) gives

$$\frac{1}{R_n} \left| \int h(Q) \int p(Q|Z, X_n^*) p(X_n^*|Z) dX_n^* dQ - \int h(Q) \int p(Q|X_n^*) p(X_n^*|Z) dX_n^* dQ \right| \quad (79)$$

$$\leq \int p(X_n^*|Z) \frac{1}{R_n} \left| \int h(Q) p(Q|Z, X_n^*) dQ - \int h(Q) p(Q|X_n^*) dQ \right| dX_n^* \quad (80)$$

$$\leq \int p(X_n^*|Z) \frac{1}{R_n} \text{TV}(\bar{Q}_n^+, \bar{Q}_n) dX_n^* \quad (81)$$

532 Because  $R_n^{-1} \text{TV}(\bar{Q}_n^+, \bar{Q}_n)$  is uniformly integrable when  $X_n^* \sim p(X_n^*|Z)$ , there exists an  $M$  such  
533 that for all  $n$ ,

$$\int_{Y_n} p(X_n^*|Z) \frac{1}{R_n} \left| \int h(Q) p(Q|Z, X_n^*) dQ - \int h(Q) p(Q|X_n^*) dQ \right| dX_n^* \leq 1 \quad (82)$$

534 where  $Y_n = \{X_n^* \mid \frac{1}{R_n} \text{TV}(\bar{Q}_n^+, \bar{Q}_n) > M\}$ .

535 Now, for all  $n$

$$\frac{1}{R_n} \left| \int h(Q) \int p(Q|Z, X_n^*) p(X_n^*|Z) dX_n^* dQ - \int h(Q) \int p(Q|X_n^*) p(X_n^*|Z) dX_n^* dQ \right| \quad (83)$$

$$\leq \int p(X_n^*|Z) \frac{1}{R_n} \left| \int h(Q) p(Q|Z, X_n^*) dQ - \int h(Q) p(Q|X_n^*) dQ \right| dX_n^* \quad (84)$$

$$= \int_{Y_n} p(X_n^*|Z) \frac{1}{R_n} \left| \int h(Q) p(Q|Z, X_n^*) dQ - \int h(Q) p(Q|X_n^*) dQ \right| dX_n^* \quad (85)$$

$$+ \int_{Y_n^c} p(X_n^*|Z) \frac{1}{R_n} \left| \int h(Q) p(Q|Z, X_n^*) dQ - \int h(Q) p(Q|X_n^*) dQ \right| dX_n^* \quad (86)$$

$$\leq 1 + \int_{Y_n^c} p(X_n^*|Z) M dX_n^* \quad (87)$$

536 so  $\text{TV}(p(Q|Z), \bar{p}_n(Q)) = O(R_n)$ . □

## 537 C Additional Examples

### 538 C.1 Gaussian with Known Variance Details

539 Checking where the mean and variance of  $\mu^* \sim \bar{p}_n(\mu)$  converge when  $n_{X^*} \rightarrow \infty$  in the Gaussian  
540 mean estimation example, when both parties use the known variance model:

$$\mathbb{E}(\mu^*) = \mathbb{E}(\mathbb{E}(\mu^*|X^*)) = \mathbb{E}(\hat{\mu}_{n_{X^*}}) \quad (88)$$

$$= \mathbb{E} \left( \frac{\frac{1}{\hat{\sigma}_0^2} \hat{\mu}_0 + \frac{n_{X^*}}{\hat{\sigma}_k^2} \bar{X}^*}{\frac{1}{\hat{\sigma}_0^2} + \frac{n_{X^*}}{\hat{\sigma}_k^2}} \right) \quad (89)$$

$$= \frac{\frac{1}{\hat{\sigma}_0^2} \hat{\mu}_0 + \frac{n_{X^*}}{\hat{\sigma}_k^2} \mathbb{E}(\bar{X}^*)}{\frac{1}{\hat{\sigma}_0^2} + \frac{n_{X^*}}{\hat{\sigma}_k^2}} \quad (90)$$

$$\rightarrow \mathbb{E}(X^*) = \bar{\mu}_{n_X} \quad (91)$$

541 as  $n_{X^*} \rightarrow \infty$ .

$$\text{Var}(\mu^*) = \mathbb{E}(\text{Var}(\mu^*|X^*)) + \text{Var}(\mathbb{E}(\mu^*|X^*)) \quad (92)$$

$$= \mathbb{E}(\hat{\sigma}_{n_{X^*}}^2) + \text{Var}(\hat{\mu}_{n_{X^*}}) \quad (93)$$

542

$$\mathbb{E}(\hat{\sigma}_{n_{X^*}}^2) = \mathbb{E}\left(\frac{1}{\frac{n_{X^*}}{\hat{\sigma}_k^2} + \frac{1}{\hat{\sigma}_0^2}}\right) \rightarrow 0, n_{X^*} \rightarrow \infty \quad (94)$$

$$\text{Var}(\hat{\mu}_{n_{X^*}}) = \text{Var}\left(\frac{\frac{n_{X^*}}{\hat{\sigma}_k^2} \bar{X}^* + \frac{\hat{\mu}_0}{\hat{\sigma}_0^2}}{\frac{n_{X^*}}{\hat{\sigma}_k^2} + \frac{1}{\hat{\sigma}_0^2}}\right) = \left(\frac{\frac{n_{X^*}}{\hat{\sigma}_k^2}}{\frac{n_{X^*}}{\hat{\sigma}_k^2} + \frac{1}{\hat{\sigma}_0^2}}\right)^2 \text{Var}(\bar{X}^*) \quad (95)$$

$$\text{Var}(\bar{X}^*) = \mathbb{E}(\text{Var}(\bar{X}^*|\bar{\mu})) + \text{Var}(\mathbb{E}(\bar{X}^*|\bar{\mu})) = \frac{1}{n_{X^*}} \mathbb{E}(\text{Var}(x_i^*)) + \text{Var}(\bar{\mu}) \rightarrow \text{Var}(\bar{\mu}) = \bar{\sigma}_{n_X}^2 \quad (96)$$

543 as  $n_{X^*} \rightarrow \infty$ .

544 Putting these together,

$$\mathbb{E}(\mu^*) \rightarrow \bar{\mu}_{n_X} \quad (97)$$

$$\text{Var}(\mu^*) \rightarrow \bar{\sigma}_{n_X}^2 \quad (98)$$

545 as  $n_{X^*} \rightarrow \infty$ .

546 The plots of  $p(\mu^*)$  in Figures [2](#), [3](#), [S1](#), [S2](#) and [S3](#) are density functions of a mixture of Gaussians,  
 547 where each mixture component is the Gaussian posterior distribution from one synthetic dataset.

## 548 C.2 Gaussian with Unknown Variance Upstream, Known Variance Downstream

549 When the synthetic data is generated from the unknown variance model,  $p(X^*|X)$  is

$$\bar{\sigma}^2|X \sim \text{Inv-}\chi^2(\bar{\nu}_{n_X}, \bar{\sigma}_{n_X}^2) \quad (99)$$

$$\bar{\mu}|\bar{\sigma}^2, X \sim \mathcal{N}\left(\bar{\mu}_{n_X}, \frac{\bar{\sigma}^2}{\bar{\kappa}_{n_X}}\right) \quad (100)$$

$$x_i^*|\bar{\mu}, \bar{\sigma}^2 \sim \mathcal{N}(\bar{\mu}, \bar{\sigma}^2). \quad (101)$$

$$(102)$$

550 When downstream analysis is the model with known variance  $\hat{\sigma}_k^2$ ,  $p(\mu^*|X^*)$  is

$$\mu^*|X^* \sim \mathcal{N}(\hat{\mu}_{n_{X^*}}, \hat{\sigma}_{n_{X^*}}^2) \quad (103)$$

$$\hat{\mu}_{n_{X^*}} = \frac{\frac{1}{\hat{\sigma}_0^2} \hat{\mu}_0 + \frac{n_{X^*}}{\hat{\sigma}_k^2} \bar{X}^*}{\frac{1}{\hat{\sigma}_0^2} + \frac{n_{X^*}}{\hat{\sigma}_k^2}} \quad (104)$$

$$\frac{1}{\hat{\sigma}_{n_{X^*}}^2} = \frac{1}{\hat{\sigma}_0^2} + \frac{n_{X^*}}{\hat{\sigma}_k^2}. \quad (105)$$

551 Checking where the mean and variance of  $\bar{p}_n(\mu)$  converge when  $n_{X^*} \rightarrow \infty$ :

$$\mathbb{E}(\mu^*) = \mathbb{E}(\mathbb{E}(\mu^*|X^*)) = \mathbb{E}(\hat{\mu}_{n_{X^*}}) \quad (106)$$

$$= \mathbb{E}\left(\frac{\frac{1}{\hat{\sigma}_0^2} \hat{\mu}_0 + \frac{n_{X^*}}{\hat{\sigma}_k^2} \bar{X}^*}{\frac{1}{\hat{\sigma}_0^2} + \frac{n_{X^*}}{\hat{\sigma}_k^2}}\right) \quad (107)$$

$$= \frac{\frac{1}{\hat{\sigma}_0^2} \hat{\mu}_0 + \frac{n_{X^*}}{\hat{\sigma}_k^2} \mathbb{E}(\bar{X}^*)}{\frac{1}{\hat{\sigma}_0^2} + \frac{n_{X^*}}{\hat{\sigma}_k^2}} \quad (108)$$

$$\rightarrow \mathbb{E}(X^*) = \bar{\mu}_{n_X} \quad (109)$$

552 as  $n_{X^*} \rightarrow \infty$ .

$$\text{Var}(\mu^*) = \mathbb{E}(\text{Var}(\mu^*|X^*)) + \text{Var}(\mathbb{E}(\mu^*|X^*)) \quad (110)$$

$$= \mathbb{E}(\hat{\sigma}_{n_{X^*}}^2) + \text{Var}(\hat{\mu}_{n_{X^*}}) \quad (111)$$



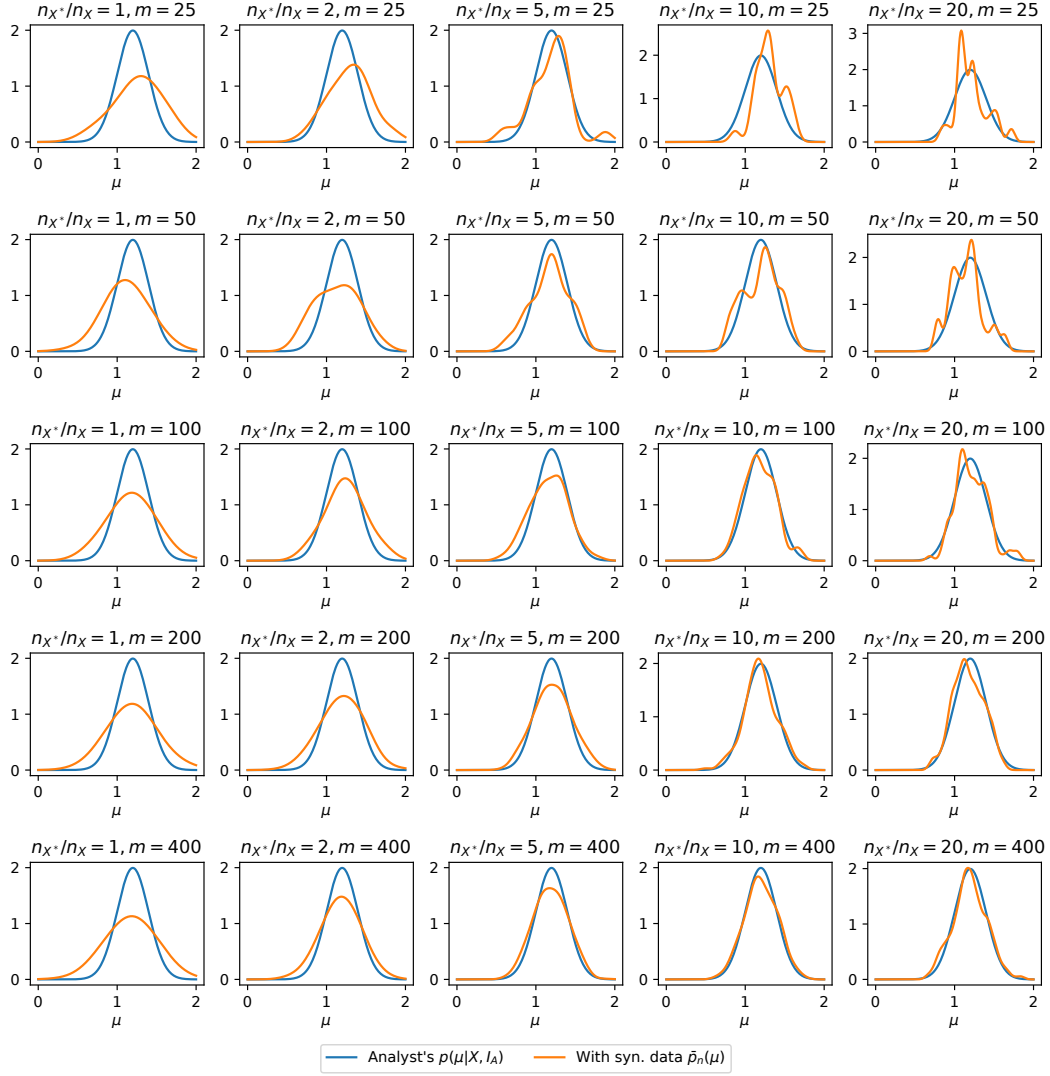

Figure S1: Convergence of the mixture of synthetic data posteriors (in orange) with different values of  $m$  and  $n_{X^*}$  in Gaussian mean estimation with known variance.

553

$$\mathbb{E}(\hat{\sigma}_{n_{X^*}}^2) = \mathbb{E}\left(\frac{1}{\frac{n_{X^*}}{\bar{\sigma}_k^2} + \frac{1}{\bar{\sigma}_0^2}}\right) \rightarrow 0, n_{X^*} \rightarrow \infty \quad (112)$$

$$\text{Var}(\hat{\mu}_{n_{X^*}}) = \text{Var}\left(\frac{\frac{n_{X^*}}{\bar{\sigma}_k^2} \bar{X}^* + \frac{\hat{\mu}_0}{\bar{\sigma}_0^2}}{\frac{n_{X^*}}{\bar{\sigma}_k^2} + \frac{1}{\bar{\sigma}_0^2}}\right) = \left(\frac{\frac{n_{X^*}}{\bar{\sigma}_k^2}}{\frac{n_{X^*}}{\bar{\sigma}_k^2} + \frac{1}{\bar{\sigma}_0^2}}\right)^2 \text{Var}(\bar{X}^*) \quad (113)$$

$$\text{Var}(\bar{X}^*) = \mathbb{E}(\text{Var}(\bar{X}^*|\bar{\mu}, \bar{\sigma}^2)) + \text{Var}(\mathbb{E}(\bar{X}^*|\bar{\mu}, \bar{\sigma}^2)) = \frac{1}{n_{X^*}} \mathbb{E}(\bar{\sigma}^2) + \text{Var}(\bar{\mu}) \rightarrow \text{Var}(\bar{\mu}) = \frac{\bar{\sigma}_0^2}{\bar{\kappa}_{n_{X^*}}} \quad (114)$$

554 as  $n_{X^*} \rightarrow \infty$ .

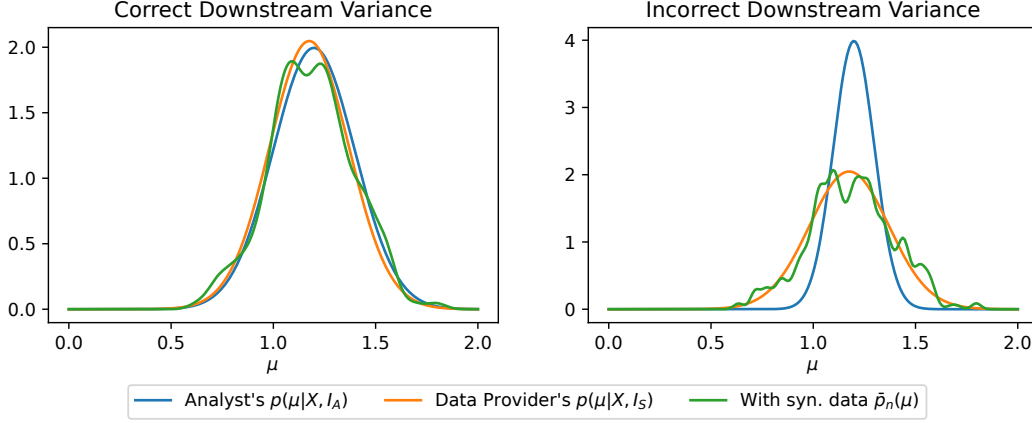

Figure S2: Results when the synthetic data is generated from the unknown variance Gaussian mean estimation model, and the analyst uses the model with known variance. On the left, the analyst's known variance is correct, on the right it is incorrect. In both cases, the mixture of synthetic data posteriors converges to the data provider's posterior. In both panels,  $m = 400$  and  $\frac{n_{X^*}}{n_X} = 20$ .

Putting these together,

$$\mathbb{E}(\mu^*) \rightarrow \bar{\mu}_{n_X} \quad (115)$$

$$\text{Var}(\mu^*) \rightarrow \frac{\bar{\sigma}_0^2}{\bar{\kappa}_{n_X}} \quad (116)$$

as  $n_{X^*} \rightarrow \infty$ , so  $\mu^*$  asymptotically has the same mean and variance as the marginal posterior of  $\mu$  in the synthetic data model, which is not the same as the downstream posterior distribution  $p(\mu|X, I_A)$  on the real data.

We verify this with the simulation in Figure S2 where the synthetic data is generated from the model with unknown variance, while the analyst uses the known variance model. The setting is otherwise identical to the case where both used the known variance model in Figure 2. The mixture of synthetic data posteriors converges to the data provider's posterior, even when the analyst uses an incorrect value for the known variance  $\hat{\sigma}_k^2$ .

### C.3 Size of the Synthetic Dataset

In the preceding analysis, most of the approximations hold when  $n_{X^*}$  is large, even when  $n_{X^*} \approx n_X$ . However, based on the experiment with different values of  $n_{X^*}$  and  $m$  in Figure S1,  $n_{X^*} \gg n_X$  is needed for all of the approximations to hold.

This is explained by looking at  $\text{Var}(\bar{X}^*)$ . In the case where both parties use the known variance model,

$$\text{Var}(\bar{X}^*) = \frac{1}{n_{X^*}} \mathbb{E}(\text{Var}(x_i^*)) + \text{Var}(\bar{\mu}) \quad (117)$$

$$= \frac{1}{n_{X^*}} (\bar{\sigma}_k^2 + \bar{\sigma}_{n_X}^2) + \bar{\sigma}_{n_X}^2 \quad (118)$$

$$= \frac{1}{n_{X^*}} \bar{\sigma}_k^2 + \left(1 + \frac{1}{n_{X^*}}\right) \frac{1}{\frac{1}{\bar{\sigma}_0^2} + \frac{n_X}{\bar{\sigma}_k^2}} \quad (119)$$

If  $n_X \approx n_{X^*}$  and both are large,  $1 + \frac{1}{n_{X^*}} \approx 1$  and  $\frac{1}{\bar{\sigma}_0^2} + \frac{n_X}{\bar{\sigma}_k^2} \approx \frac{n_X}{\bar{\sigma}_k^2}$ , so

$$\text{Var}(\bar{X}^*) \approx \frac{\bar{\sigma}_k^2}{n_{X^*}} + \frac{\bar{\sigma}_k^2}{n_X} \approx \frac{2\bar{\sigma}_k^2}{n_X} \quad (120)$$

With these approximations,

$$\text{Var}(\bar{\mu}) \approx \frac{\bar{\sigma}_k^2}{n_X} \quad (121)$$

572 so

$$\text{Var}(\bar{X}^*) \approx 2\text{Var}(\bar{\mu}) \quad (122)$$

573 while the  $n_{X^*} \rightarrow \infty$  limit is  $\text{Var}(\bar{X}^*) \rightarrow \text{Var}(\bar{\mu})$ . This means that  $n_{X^*} \gg n_X$  is required.

574 The same happens when the synthetic data is generated from the unknown variance model:

$$\text{Var}(\bar{X}^*) = \frac{1}{n_{X^*}} \mathbb{E}(\bar{\sigma}^2) + \text{Var}(\bar{\mu}) \quad (123)$$

$$= \frac{1}{n_{X^*}} \frac{\bar{\nu}_0 + n_X}{\bar{\nu}_0 + n_X - 2} \bar{\sigma}_{n_X}^2 + \frac{\bar{\sigma}_{n_X}^2}{\bar{\kappa}_0 + n_X} \quad (124)$$

575 If  $n_X \approx n_{X^*}$  and both are large,  $\frac{\bar{\nu}_0 + n_X}{\bar{\nu}_0 + n_X - 2} \approx 1$  and  $\bar{\kappa}_0 + n_X \approx n_X$ , so

$$\text{Var}(\bar{X}^*) \approx \frac{\bar{\sigma}_{n_X}^2}{n_{X^*}} + \frac{\bar{\sigma}_{n_X}^2}{n_X} \approx \frac{2\bar{\sigma}_{n_X}^2}{n_X} \quad (125)$$

576 With these approximations,

$$\text{Var}(\bar{\mu}) \approx \frac{\bar{\sigma}_{n_X}^2}{n_X} \quad (126)$$

577 so

$$\text{Var}(\bar{X}^*) \approx 2\text{Var}(\bar{\mu}). \quad (127)$$

#### 578 C.4 Further Approximation

579 When  $n_{X^*}$  is large,

$$\text{Var}(\mu^*) \approx \mathbb{E}(\hat{\sigma}_{X^*}^2) + \text{Var}(\bar{X}^*) \quad (128)$$

580 If  $n_{X^*} = cn_X$  for some  $c > 0$ , from the analyses in Section C.3 we get

$$\text{Var}(\bar{X}) \approx \left(1 + \frac{1}{c}\right) \text{Var}(\bar{\mu}) \quad (129)$$

581 so

$$\text{Var}(\mu^*) \approx \mathbb{E}(\hat{\sigma}_{n_{X^*}}^2) + \left(1 + \frac{1}{c}\right) \text{Var}(\bar{\mu}) \quad (130)$$

582 Solving for  $\text{Var}(\bar{\mu})$  gives

$$\text{Var}(\bar{\mu}) \approx \left(1 + \frac{1}{c}\right)^{-1} (\text{Var}(\mu^*) - \mathbb{E}(\hat{\sigma}_{n_{X^*}}^2)) \quad (131)$$

583 which gives a Rubin’s rules-like approximation of  $\text{Var}(\mu)$  that can be computed from smaller synthetic  
584 datasets with  $n_{X^*} \approx n_X$ .

585 We validate this with the experiment in Figure S3, which shows that approximating  $p(\mu|X, I_A)$  with  
586 a Gaussian with variance from (131) is closer to the real data posterior than the mixed posterior  
587 approximation from Section 3.

#### 588 C.5 Logistic Regression

589 **Setting Details** In the toy data setting of Räisä et al. (2023), the real dataset consists of  $n_X = 2000$   
590 i.i.d. samples of three binary variables. The first two variables are sampled with independent coinflips,  
591 and the third is sampled from logistic regression on the other two, with coefficients  $(1, 0)$ .

592 We generate synthetic data with the NAPSU-MQ algorithm (Räisä et al. 2023), instructing the  
593 algorithm to generate  $m$  synthetic datasets of size  $n_{X^*}$ . DP-GLM doesn’t use synthetic data, so we  
594 run it directly on the real data. For the privacy bounds, we vary  $\epsilon$ , and set  $\delta = n_X^{-2} = 2.5 \cdot 10^{-7}$ ,  
595 which is how DP mechanisms are typically evaluated.

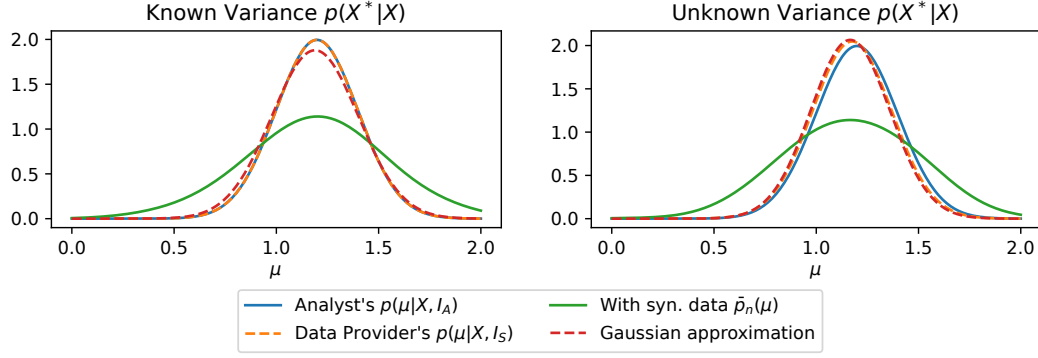

Figure S3: Results with the Gaussian approximation with  $n_{X^*} = n_X$ , showing that the Gaussian approximation is closer to the real data posterior than the mixture of synthetic data posteriors. On the left, the synthetic data is generated from the known variance model, and on the right, the synthetic data is generated from the unknown variance model. In both cases, the known variances for both parties are correct, and  $m = 400$ .

**Hyperparameters** For NAPSU-MQ, we use the hyperparameters of Räisä et al. (2023), except we used NUTS (Hoffman and Gelman 2014) with 200 warmup samples and 500 kept samples for  $\epsilon \in \{0.5, 1\}$ , and 1500 kept samples for  $\epsilon = 0.1$ , as the posterior sampling algorithm. The prior is  $\mathcal{N}(0, 10^2 I)$ , and the marginal queries are the full set of 3-way marginals of all three variables.

The hyperparameters of DP-GLM are the  $L_2$ -norm upper bound  $R$  for the covariates of the logistic regression, a coefficient norm upper bound  $s$ , and the parameters of the posterior sampling algorithm DP-GLM uses. We set  $R = \sqrt{2}$  so that the covariates do not get clipped, and set  $s = 5$  after some preliminary runs. The posterior sampling algorithm is NUTS (Hoffman and Gelman 2014) with 1000 warmup iterations and 1000 kept samples from 4 parallel chains.

**Plotting Details** The plotted density of DP-GLM in Figure 4 is a kernel density estimate from the posterior samples DP-GLM returns. The non-DP density is a Laplace approximation. Both synthetic data methods use Laplace approximations in the downstream analysis, so their posteriors are mixtures of these Laplace approximations for each synthetic dataset. This was also used in Figure S5

**Sampling the exact posterior** In order to sample the exact posterior  $p(Q|\tilde{s})$ , we use another decomposition:

$$p(Q|\tilde{s}) = \int p(Q|\tilde{s}, X)p(X|\tilde{s}) dX = \int p(Q|X)p(X|\tilde{s}) dX, \quad (132)$$

where  $p(Q|\tilde{s}, X) = p(Q|X)$  due to the independencies of the graphical model in Figure 1. It remains to sample  $p(X|\tilde{s})$ . This is not tractable in general, but is possible in the toy data setting due to using the full set of 3-way marginals that covers all possible values of a datapoint, and the simplicity of the toy data.

We can decompose

$$p(X|\tilde{s}) = \int p(s|\tilde{s})p(X|s) d\theta dX = \int p(X|s) \int p(s, \theta|\tilde{s}) d\theta dX, \quad (133)$$

so we can sample  $(s, \theta) \sim p(s, \theta|s)$  and then sample  $X \sim p(X|s)$  to obtain a sample from  $p(X|\tilde{s})$ . Due to the simplicity of the toy data setting, sampling both  $p(s, \theta|s)$  and  $p(X|s)$  is possible.

NAPSU-MQ uses the following Bayesian inference problem:

$$\theta \sim \text{Prior} \quad (134)$$

$$X \sim \text{MED}_\theta^n \quad (135)$$

$$s = a(X) \quad (136)$$

$$\tilde{s} \sim \mathcal{N}(s, \sigma_{DP}^2), \quad (137)$$

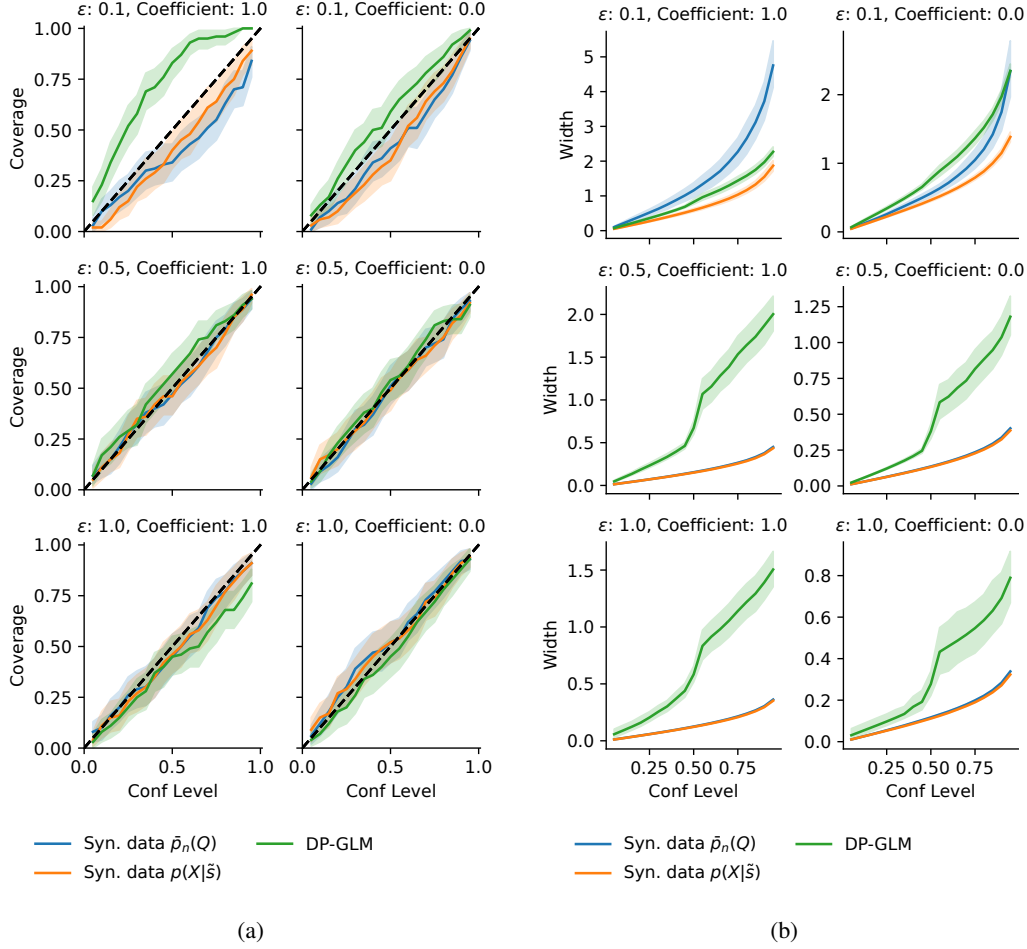

Figure S4: (a) Coverages of credible intervals in the toy data experiment. The mixture of synthetic data posteriors is accurate, except with  $\epsilon = 0.1$ , where it may not have converged yet. (b) Widths of credible intervals in the toy data experiment. DP-GLM produces much wider intervals than other methods, except with  $\epsilon = 0.1$ .

where  $a$  are the marginal queries,  $\sigma_{DP}^2$  is the noise variance of the Gaussian mechanism, and  $\text{MED}_{\theta}^n$  is the maximum entropy distribution (Räisä et al. 2023) with point probability

$$p(x) = \exp(\theta^T a(x) - \theta_0(\theta)), \quad (138)$$

where  $\theta_0$  is the log-normalising constant.

In the toy data setting,  $a$  is the full set of 3-way marginals for all of the 3 variables. In other words,  $a(x)$  is the one-hot coding of  $x$ , so  $s = a(X)$  is a vector of counts of how many times each of the 8 possible values is repeated in  $X$ . This means that sampling  $p(X|s)$  is simple:

1. For each possible value of a datapoint, find the corresponding count from  $s$ , and repeat that datapoint according to that count.
2. Shuffle the datapoints to a random order.

As the downstream analysis  $p(Q|X)$  doesn't depend on the order of the datapoints, the second step is not actually needed.

To sample  $p(s, \theta|\tilde{s})$ , we use a Metropolis-within-Gibbs sampler (Gilks et al. 1995) that sequentially updates  $s$  and  $\theta$  while keeping the other fixed. The proposal for  $\theta$  is obtained from Hamiltonian Monte Carlo (HMC) (Duane et al. 1987; Neal 2011). The proposal for  $s$  is obtained by repeatedly choosing a random index in  $s$  to increment and another to decrement. It is possible to obtain negative values in

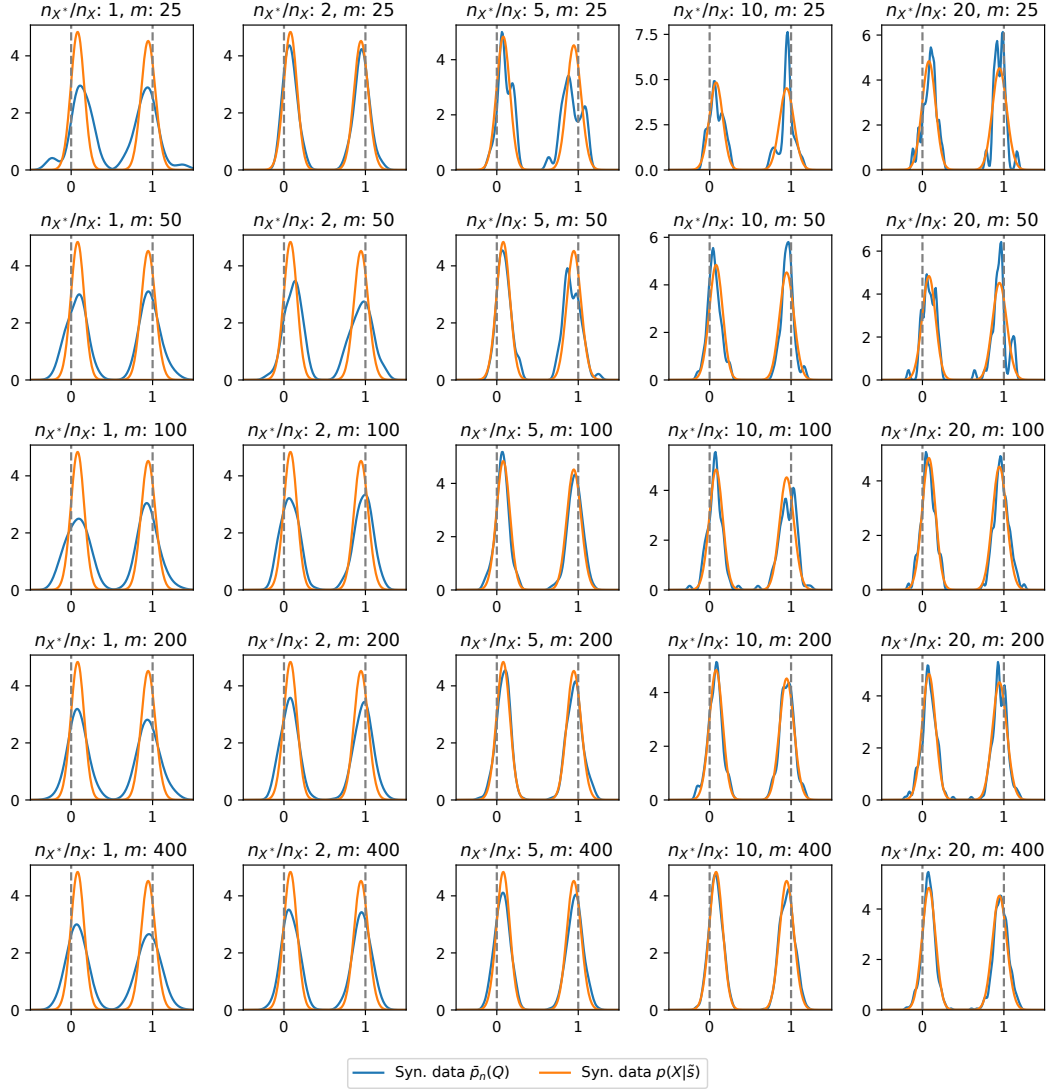

Figure S5: Convergence of the mixture of synthetic data posteriors (in blue) with different values of  $m$  and  $n_{X^*}$  in the toy data logistic regression experiment.

634  $s$  from this proposal, but those will always be rejected by the acceptance test, as the likelihood for  
635 them is 0.

636 To initialise the sampler, we pick an initial value for  $\theta$  from a Gaussian distribution, and pick the  
637 initial  $s$  by rounding  $\tilde{s}$  to integer values, changing the rounded values such that they sum to  $n$  while  
638 ensuring that all values are non-negative.

639 The step size for the HMC we used is 0.05, and the number of steps is 20. In the  $s$  proposal, we  
640 repeat the combination of an increment and a decrement 30 times. We take 20000 samples in total  
641 from 4 parallel chains, and drop the first 20% as warmup samples.

642 The method described in this section is similar to the noise-aware Bayesian inference method of  
643 Ju et al. (2022). The difference between the two is that Ju et al. (2022) use  $X$  instead of  $s$  as the  
644 auxiliary variable, and they sample the  $X$  proposals from the model, changing one datapoint at a  
645 time. This makes their algorithm more generalisable.

## 646 D Gaussian Known Variance Convergence Rate

647 **Theorem D.1.** *When the up- and downstream models are Gaussian mean estimations with known*  
 648 *variance, when  $D_n = \mathcal{N}(\bar{X}, n^{-1}\sigma_k^2)$ ,*

$$\sqrt{n} \text{TV}(\bar{Q}_n, D_n) \quad (139)$$

649 and

$$\sqrt{n} \text{TV}(\bar{Q}_n^+, D_n) \quad (140)$$

650 are uniformly integrable when  $X_n^* \sim p(X_n^*|X)$ .

651 *Proof.* When the downstream model is Gaussian mean estimation with known variance,

$$\bar{Q}_n = \mathcal{N}(\mu_n, \sigma_n^2) \quad (141)$$

652

$$\mu_n = \frac{\frac{1}{\sigma_0^2}\mu_0 + \frac{n}{\sigma_k^2}\bar{X}}{\frac{1}{\sigma_0^2} + \frac{n}{\sigma_k^2}} \quad (142)$$

653

$$\frac{1}{\sigma_n^2} = \frac{1}{\sigma_0^2} + \frac{n}{\sigma_k^2} \quad (143)$$

654 We start with the proof for  $\sqrt{n} \text{TV}(\bar{Q}_n, D_n)$ . By Pinsker's equality and the formula for KL-  
 655 divergence between Gaussians,

$$\sqrt{n} \text{TV}(\bar{Q}_n, D_n) \leq \sqrt{\frac{1}{2}n\text{KL}(\bar{Q}_n || D_n)} \quad (144)$$

$$= \sqrt{\frac{1}{4}n \left( \frac{\sigma_k^2}{n\sigma_n^2} + \frac{(\mu_n - \bar{X})^2}{\sigma_n^2} - 1 + \ln \frac{n\sigma_n^2}{\sigma_k^2} \right)} \quad (145)$$

$$\leq \sqrt{\left| \frac{1}{4}n \left( \frac{\sigma_k^2}{n\sigma_n^2} - 1 \right) \right| + \frac{1}{4}n \frac{(\mu_n - \bar{X})^2}{\sigma_n^2} + \left| \frac{1}{4}n \ln \frac{n\sigma_n^2}{\sigma_k^2} \right|} \quad (146)$$

$$\leq \sqrt{\left| \frac{1}{4}n \left( \frac{\sigma_k^2}{n\sigma_n^2} - 1 \right) \right|} + \sqrt{\frac{1}{4}n \frac{(\mu_n - \bar{X})^2}{\sigma_n^2}} + \sqrt{\left| \frac{1}{4}n \ln \frac{n\sigma_n^2}{\sigma_k^2} \right|} \quad (147)$$

656 The last inequality can be deduced from the fact that the  $L_2$ -norm is upper bounded by the  $L_1$  norm.

657 Denote

$$C_1(n) = n \left( \frac{\sigma_k^2}{n\sigma_n^2} - 1 \right) = \left( \frac{1}{\sigma_0^2} + \frac{n}{\sigma_k^2} \right) \sigma_k^2 - n = \frac{\sigma_k^2}{\sigma_0^2} + n - n = \frac{\sigma_k^2}{\sigma_0^2} \quad (148)$$

658 and

$$C_2(n) = n \ln \frac{n\sigma_n^2}{\sigma_k^2} \quad (149)$$

$$= -n \ln \frac{\sigma_k^2}{n\sigma_n^2} \quad (150)$$

$$= -n \ln \left( \left( \frac{1}{\sigma_0^2} + \frac{n}{\sigma_k^2} \right) \frac{\sigma_k^2}{n} \right) \quad (151)$$

$$= -n \ln \left( \frac{\sigma_k^2}{n\sigma_0^2} + 1 \right) \quad (152)$$

$$= -\frac{u\sigma_k^2}{\sigma_0^2} \ln \left( \frac{1}{u} + 1 \right) \quad (153)$$

$$= -\frac{\sigma_k^2}{\sigma_0^2} \ln \left( \frac{1}{u} + 1 \right)^u \quad (154)$$

659 with  $n = \frac{u\sigma_k^2}{\sigma_0^2}$ . Because

$$\lim_{u \rightarrow \infty} \left(1 + \frac{1}{u}\right)^u = e \quad (155)$$

660 we have

$$\lim_{u \rightarrow \infty} -\frac{\sigma_k^2}{\sigma_0^2} \ln \left(\frac{1}{u} + 1\right)^u = -\frac{\sigma_k^2}{\sigma_0^2} \quad (156)$$

661 which implies that  $C_2(n)$  is bounded.

662 Furthermore,

$$\sqrt{\frac{1}{4}n \frac{(\mu_n - \bar{X})^2}{\sigma_n^2}} = \frac{1}{2} \sqrt{n \left(\frac{1}{\sigma_0^2} + \frac{n}{\sigma_k^2}\right)} |\mu_n - \bar{X}| \quad (157)$$

663 Denote

$$s_n = \frac{1}{2} \sqrt{n \left(\frac{1}{\sigma_0^2} + \frac{n}{\sigma_k^2}\right)} \quad (158)$$

664 Note that  $s_n = O(n)$ .

665 Then

$$\sqrt{\frac{1}{4}n \frac{n(\mu_n - \bar{X})^2}{n\sigma_n^2}} = s_n |\mu_n - \bar{X}| \quad (159)$$

$$s_n |\mu_n - \bar{X}| = s_n \left| \frac{\frac{1}{\sigma_0^2} \mu_0}{\frac{1}{\sigma_0^2} + \frac{n}{\sigma_k^2}} + \frac{\frac{n}{\sigma_k^2} \bar{X}}{\frac{1}{\sigma_0^2} + \frac{n}{\sigma_k^2}} - \bar{X} \right| \quad (160)$$

$$\leq s_n \frac{\frac{1}{\sigma_0^2} \mu_0}{\frac{1}{\sigma_0^2} + \frac{n}{\sigma_k^2}} + s_n \left| \frac{\frac{n}{\sigma_k^2}}{\frac{1}{\sigma_0^2} + \frac{n}{\sigma_k^2}} - 1 \right| |\bar{X}| \quad (161)$$

$$= s_n \frac{\frac{1}{\sigma_0^2} \mu_0}{\frac{1}{\sigma_0^2} + \frac{n}{\sigma_k^2}} + s_n \left| \frac{\frac{n}{\sigma_k^2}}{\frac{1}{\sigma_0^2} + \frac{n}{\sigma_k^2}} - \frac{\frac{1}{\sigma_0^2} + \frac{n}{\sigma_k^2}}{\frac{1}{\sigma_0^2} + \frac{n}{\sigma_k^2}} \right| |\bar{X}| \quad (162)$$

$$= s_n \frac{\frac{1}{\sigma_0^2} \mu_0}{\frac{1}{\sigma_0^2} + \frac{n}{\sigma_k^2}} + s_n \frac{\frac{1}{\sigma_0^2}}{\frac{1}{\sigma_0^2} + \frac{n}{\sigma_k^2}} |\bar{X}|. \quad (163)$$

666 Denote

$$C_3(n) = s_n \frac{\frac{1}{\sigma_0^2} \mu_0}{\frac{1}{\sigma_0^2} + \frac{n}{\sigma_k^2}} \quad (164)$$

667 and

$$C_4(n) = s_n \frac{\frac{1}{\sigma_0^2}}{\frac{1}{\sigma_0^2} + \frac{n}{\sigma_k^2}}. \quad (165)$$

668 Because  $s_n = O(n)$ , we have  $C_3(n) = O(1)$  and  $C_4(n) = O(1)$ , so  $C_3(n)$  and  $C_4(n)$  are bounded.

669 We now have

$$\sqrt{n} \text{TV}(\bar{Q}_n, D_n) \leq \sqrt{\frac{1}{4}|C_1(n)|} + \sqrt{\frac{1}{4}|C_2(n)|} + C_3(n) + C_4(n) \bar{X}. \quad (166)$$

670 By Lemmas [B.3](#) and [B.4](#), it suffices to show that each of the terms on the right is uniformly integrable.  
671 The terms containing  $C_1, C_2$  and  $C_3$  are non-random and bounded in  $n$ , so they are uniformly  
672 integrable. It remains to show that  $C_4(n)\bar{X}$  is uniformly integrable.  $C_4(n)$  is bounded, so we only  
673 need to show that  $\bar{X}$  is uniformly integrable.



674 To bound the expectation in the definition of uniform integrability for  $|\bar{X}|$ , we need some background  
 675 facts. For geometric series, with  $a \in \mathbb{R}$  and  $|r| < 1$ ,

$$\sum_{i=0}^{\infty} ar^i = \frac{a}{1-r}, \quad (167)$$

676 and differentiating both sides with regards to  $r$  gives

$$\sum_{i=0}^{\infty} a(i+1)r^i = \frac{a}{(1-r)^2}. \quad (168)$$

677 For a Gaussian random variable  $Y$  with mean  $\mu$  and variance  $\sigma$ ,  $\Pr(Y > \mu + t) \leq e^{-\frac{t^2}{2\sigma^2}}$ .  $\bar{X} \sim$   
 678  $\mathcal{N}(\mu, \frac{1}{n}\sigma_k^2)$ , so this tail bound gives

$$\Pr(\bar{X} > t + \mu) \leq 2e^{-\frac{nt^2}{2\sigma_k^2}}. \quad (169)$$

679 By the symmetry of the Gaussian distribution,

$$\Pr(\bar{X} < \mu - t) \leq 2e^{-\frac{nt^2}{2\sigma_k^2}}. \quad (170)$$

680 Now

$$\lim_{M \rightarrow \infty} \sup_n \mathbb{E}(|\bar{X}| \mathbb{I}_{|\bar{X}| > M}) \quad (171)$$

$$= \lim_{M \rightarrow \infty} \sup_n \mathbb{E}_{\mu}(\mathbb{E}(|\bar{X}| \mathbb{I}_{|\bar{X}| > M} | \mu)) \quad (172)$$

$$= \lim_{M \rightarrow \infty} \sup_n \mathbb{E}_{\mu} \left( \sum_{i=0}^{\infty} \mathbb{E}(|\bar{X}| \mathbb{I}_{M+i < |\bar{X}| \leq M+i+1} | \mu) \right) \quad (173)$$

$$\leq \lim_{M \rightarrow \infty} \sup_n \mathbb{E}_{\mu} \left( \sum_{i=0}^{\infty} \mathbb{E}((M+i+1) \mathbb{I}_{|\bar{X}| > M+i} | \mu) \right) \quad (174)$$

$$= \lim_{M \rightarrow \infty} \sup_n \mathbb{E}_{\mu} \left( \sum_{i=0}^{\infty} (M+i+1) \Pr(|\bar{X}| > M+i | \mu) \right) \quad (175)$$

$$= \lim_{M \rightarrow \infty} \sup_n \mathbb{E}_{\mu} \left( \sum_{i=0}^{\infty} (M+i+1) \left( \Pr(\bar{X} > M+i | \mu) + \Pr(\bar{X} < -M-i | \mu) \right) \right) \quad (176)$$

$$\leq \lim_{M \rightarrow \infty} \sup_n \mathbb{E}_{\mu} \left( \sum_{i=0}^{\infty} (M+i+1) \left( e^{-\frac{n(M+i-\mu)^2}{2\sigma_k^2}} + e^{-\frac{n(\mu+M+i)^2}{2\sigma_k^2}} \right) \right) \quad (177)$$

$$\leq \lim_{M \rightarrow \infty} \mathbb{E}_{\mu} \left( \sum_{i=0}^{\infty} (M+i+1) \left( e^{-\frac{(M+i-\mu)^2}{2\sigma_k^2}} + e^{-\frac{(\mu+M+i)^2}{2\sigma_k^2}} \right) \right). \quad (178)$$

681 When  $|M+i-\mu| \geq 1$ ,  $(M+i-\mu)^2 \geq M+i-\mu$ . It is possible that  $|M+i-\mu| < 1$  for exactly  
 682 two values of  $i$  that depend on  $\mu$ . Let  $i_{\mu 1}$  and  $i_{\mu 2}$  be those values. We know that  $i_{\mu j} < 1 + \mu - M$   
 683 for  $j \in \{1, 2\}$ . Now

$$\begin{aligned} \mathbb{E}_{\mu} \left( \sum_{i=0}^{\infty} (M+i+1) e^{-\frac{(M+i-\mu)^2}{2\sigma_k^2}} \right) &= \mathbb{E}_{\mu} \left( \sum_{i=0, i \neq i_{\mu 1}, i \neq i_{\mu 2}}^{\infty} (M+i+1) e^{-\frac{(M+i-\mu)^2}{2\sigma_k^2}} \right) \\ &\quad + \mathbb{E}_{\mu} \left( (M+i_{\mu 1}+1) e^{-\frac{(M+i_{\mu 1}-\mu)^2}{2\sigma_k^2}} \right) \\ &\quad + \mathbb{E}_{\mu} \left( (M+i_{\mu 2}+1) e^{-\frac{(M+i_{\mu 2}-\mu)^2}{2\sigma_k^2}} \right), \end{aligned} \quad (179)$$

684 Now we can upper bound the series using  $(M + i - \mu)^2 \geq M + i - \mu$  and the formulas for geometric  
 685 series.

$$\mathbb{E}_\mu \left( \sum_{i=0, i \neq i_{\mu 1}, i \neq i_{\mu 2}}^{\infty} (M + i + 1) e^{-\frac{(M+i-\mu)^2}{2\sigma_k^2}} \right) \quad (180)$$

$$\leq \mathbb{E}_\mu \left( \sum_{i=0, i \neq i_{\mu 1}, i \neq i_{\mu 2}}^{\infty} (M + i + 1) e^{-\frac{(M+i-\mu)}{2\sigma_k^2}} \right) \quad (181)$$

$$\leq \mathbb{E}_\mu \left( \sum_{i=0}^{\infty} (M + i + 1) e^{-\frac{(M+i-\mu)}{2\sigma_k^2}} \right) \quad (182)$$

$$= \mathbb{E}_\mu \left( \sum_{i=0}^{\infty} (M + i + 1) e^{-\frac{(M-\mu)}{2\sigma_k^2}} \left( e^{-\frac{1}{2\sigma_k^2}} \right)^i \right) \quad (183)$$

$$= \mathbb{E}_\mu \left( \sum_{i=0}^{\infty} M e^{-\frac{(M-\mu)}{2\sigma_k^2}} \left( e^{-\frac{1}{2\sigma_k^2}} \right)^i \right) + \mathbb{E}_\mu \left( \sum_{i=0}^{\infty} (i + 1) e^{-\frac{(M-\mu)}{2\sigma_k^2}} \left( e^{-\frac{1}{2\sigma_k^2}} \right)^i \right) \quad (184)$$

$$= \mathbb{E}_\mu \left( \frac{M e^{-\frac{(M-\mu)}{2\sigma_k^2}}}{1 - e^{-\frac{1}{2\sigma_k^2}}} \right) + \mathbb{E}_\mu \left( \frac{M e^{-\frac{(M-\mu)}{2\sigma_k^2}}}{\left(1 - e^{-\frac{1}{2\sigma_k^2}}\right)^2} \right) \quad (185)$$

$$= \left( \frac{M}{1 - e^{-\frac{1}{2\sigma_k^2}}} + \frac{M}{\left(1 - e^{-\frac{1}{2\sigma_k^2}}\right)^2} \right) \mathbb{E}_\mu \left( e^{-\frac{(M-\mu)}{2\sigma_k^2}} \right), \quad (186)$$

686 For the expectation, we have

$$\mathbb{E}_\mu \left( e^{-\frac{M-\mu}{2\sigma_k^2}} \right) = e^{-\frac{M}{2\sigma_k^2}} \mathbb{E}_\mu \left( e^{\frac{1}{2\sigma_k^2} \mu} \right). \quad (187)$$

687  $\mathbb{E}_\mu \left( e^{\frac{1}{2\sigma_k^2} \mu} \right)$  is finite, as it is an evaluation of the moment generating function of  $\mu$ , which means that

$$\lim_{M \rightarrow \infty} \left( \frac{M}{1 - e^{-\frac{1}{2\sigma_k^2}}} + \frac{M}{\left(1 - e^{-\frac{1}{2\sigma_k^2}}\right)^2} \right) \mathbb{E}_\mu \left( e^{-\frac{(M-\mu)}{2\sigma_k^2}} \right) = 0. \quad (188)$$

688 For the two other terms on the RHS of (179)

$$\mathbb{E}_\mu \left( (M + i_{\mu j} + 1) e^{-\frac{(M+i_{\mu j}-\mu)^2}{2\sigma_k^2}} \right) \leq \mathbb{E}_\mu \left( (M + 1 + \mu - M + 1) e^{-\frac{(M+i_{\mu j}-\mu)^2}{2\sigma_k^2}} \right) \quad (189)$$

$$= \mathbb{E}_\mu \left( (\mu + 2) e^{-\frac{(M+i_{\mu j}-\mu)^2}{2\sigma_k^2}} \right) \quad (190)$$

$$\rightarrow 0 \quad (191)$$

689 as  $M \rightarrow \infty$  by the dominated convergence theorem, as

$$(\mu + 2) e^{-\frac{(M+i_{\mu j}-\mu)^2}{2\sigma_k^2}} \leq (\mu + 2) e^{-\frac{0}{2\sigma_k^2}}, \quad (192)$$

690 and the right-hand-side has a finite expectation.

691 We have now shown that one part of the limit in (178) is 0. For the other part, setting  $\mu' = -\mu$ , and  
 692 using the reasoning above with  $\mu$  replaced by  $\mu'$ , we have

$$\lim_{M \rightarrow \infty} \mathbb{E}_\mu \left( \sum_{i=0}^{\infty} (M+i+1) \left( e^{-\frac{(\mu+M+i)^2}{2\sigma_k^2}} \right) \right) \quad (193)$$

$$= \lim_{M \rightarrow \infty} \mathbb{E}_{\mu'} \left( \sum_{i=0}^{\infty} (M+i+1) \left( e^{-\frac{(M+i-\mu')^2}{2\sigma_k^2}} \right) \right) \quad (194)$$

$$= 0. \quad (195)$$

693 so the limit in (178) is 0.

694 We have now shown that

$$\lim_{M \rightarrow \infty} \sup_n \mathbb{E}(|\bar{X}| \mathbb{I}_{|\bar{X}| > M}) = 0, \quad (196)$$

695 or, in other words, that  $|\bar{X}|$  is uniformly integrable. As shown earlier, this concludes the proof that

$$\sqrt{n} \text{TV}(\bar{Q}_n, D_n) \quad (197)$$

696 is uniformly integrable when  $X_n^* \sim p(X_n^*|X)$ .

697 To show that  $\sqrt{n} \text{TV}(\bar{Q}_n^+, D_n)$  is uniformly integrable, as in the proof of Lemma 3.3

$$p(Q|X, X^*) \propto p(X^*|Q)p(X|Q)p(Q), \quad (198)$$

698 so we can view both  $p(Q|X, X_n^*)$  and  $p(Q|X_n^*)$  as the posteriors for the same Bayesian inference  
 699 problem with observed data  $X^*$ , and priors  $p(Q|X) \propto p(X|Q)p(Q)$  and  $p(Q)$ , respectively.  $p(Q|X)$   
 700 is Gaussian, so the uniform integrability of

$$\sqrt{n} \text{TV}(\bar{Q}_n^+, D_n) \quad (199)$$

701 follows from the previous case with different values for  $\mu_0$  and  $\sigma_0^2$ .  $\square$

## 702 E Finite Number of Synthetic Datasets

703 In practice, we only have a finite number of synthetic datasets, so we must further approximate

$$p(Q|Z) \approx \int p(Q|X^*)p(X^*|Z) dX^* \approx \frac{1}{m} \sum_{i=1}^m p(Q|X^* = X_i^*), \quad (200)$$

704 with  $X_i^* \sim p(X^*|Z)$ .

705 From the strong law of large numbers, for any  $n$  and  $Q$ ,

$$\frac{1}{m} \sum_{i=1}^m p(Q|X^* = X_{i,n}^*) \rightarrow \int p(Q|X_n^*)p(X_n^*|Z) dX_n^* = \bar{p}_n(Q) \quad (201)$$

706 almost surely as  $m \rightarrow \infty$  when  $X_{i,n}^* \sim p(X_n^*|Z)$ .

707 Total variation distance is a metric, so

$$\begin{aligned} & \text{TV} \left( \frac{1}{m} \sum_{i=1}^m p(Q|X_{i,n}^*), p(Q|Z) \right) \\ & \leq \text{TV} \left( \frac{1}{m} \sum_{i=1}^m p(Q|X_{i,n}^*), \bar{p}_n(Q) \right) + \text{TV}(\bar{p}_n(Q), p(Q|Z)). \end{aligned} \quad (202)$$

708 Theorem 3.4 gives

$$\lim_{n \rightarrow \infty} \text{TV}(\bar{p}_n(Q), p(Q|Z)) = 0. \quad (203)$$

709 (201) implies (van der Vaart 1998, Corollary 2.30)

$$\lim_{m \rightarrow \infty} \text{TV} \left( \frac{1}{m} \sum_{i=1}^m p(Q|X_{i,n}^*), \bar{p}_n(Q) \right) = 0 \quad (204)$$

710 for almost all  $X_{i,n}^*$ , so

$$\lim_{n \rightarrow \infty} \lim_{m \rightarrow \infty} \text{TV} \left( \frac{1}{m} \sum_{j=1}^m p(Q|X_{j,n}^*), p(Q|Z) \right) = 0 \quad (205)$$

711 almost surely when  $X_{j,n}^* \sim p(X_n^*|Z)$ .

712 Based on the experiment in Figure [S1](#), it looks like

$$\lim_{m \rightarrow \infty} \lim_{n \rightarrow \infty} \text{TV} \left( \frac{1}{m} \sum_{j=1}^m p(Q|X_{j,n}^*), p(Q|Z) \right) \neq 0 \quad (206)$$

713 because the distributions  $p(Q|X_{i,n}^*)$  become narrower as  $n$  increases, so a fixed number of them is  
714 not enough to cover  $p(Q|Z)$ .

## 715 F Relation to Missing Data Imputation

716 In the missing data setting, only a part  $X_{obs}$  of the complete dataset  $X$  is observed, while a part  $X_{mis}$   
717 is missing (Rubin [1987](#)). To facilitate downstream analysis, the missing data is imputed by sampling  
718  $X_{mis} \sim p(X_{mis}|X_{obs}, I_I)$ . Analogously with synthetic data,  $I_I$  represents the imputer's background  
719 knowledge.

720 Like with synthetic data, we have the decomposition (Gelman et al. [2014](#))

$$p(Q|X_{obs}, I_A) = \int p(Q|X_{obs}, X_{mis}, I_A) p(X_{mis}|X_{obs}, I_A) dX_{mis}. \quad (207)$$

721 If the analyst's and imputer's models are congenial in the sense that

$$p(Q|X_{obs}, I_A) = p(Q|X_{obs}, I_I) \quad (208)$$

722 and

$$p(Q|X, I_A) = p(Q|X, I_I) \quad (209)$$

723 for any complete dataset  $X$ , then

$$\begin{aligned} p(Q|X_{obs}, I_A) &= p(Q|X_{obs}, I_I) = \int p(Q|X_{obs}, X_{mis}, I_I) p(X_{mis}|X_{obs}, I_I) dX_{mis} \\ &= \int p(Q|X_{obs}, X_{mis}, I_A) p(X_{mis}|X_{obs}, I_I) dX_{mis}, \end{aligned} \quad (210)$$

724 so sampling  $p(Q|X_{obs}, I_A)$  can be done by sampling  $X_{mis} \sim p(X_{mis}|X_{obs}, I_I)$  multiple times,  
725 sampling  $p(Q|X_{obs}, X_{mis}, I_A)$  for each  $X_{mis}$ , and combining the samples. Unlike with synthetic  
726 data, where sampling  $p(Q|X, X^*, I_A)$  would require the original data and defeat the purpose of using  
727 synthetic data, in the missing data setting, sampling  $p(Q|X_{obs}, X_{mis}, I_A)$  is simply the analysis for a  
728 complete dataset, so generating large imputed datasets is not required.
